# Supplementary figures and images for: A Near-Infrared Excited FRET-Based Fluorescent Sensor Using Core–Shell Upconversion Nanoparticles Functionalized with Rhodamine B Derivative for Highly Selective Detection of Hg²⁺
Source: Research Square preprint supplement (doi:10.21203/rs.3.rs-8629365/v1), 2026-01-28

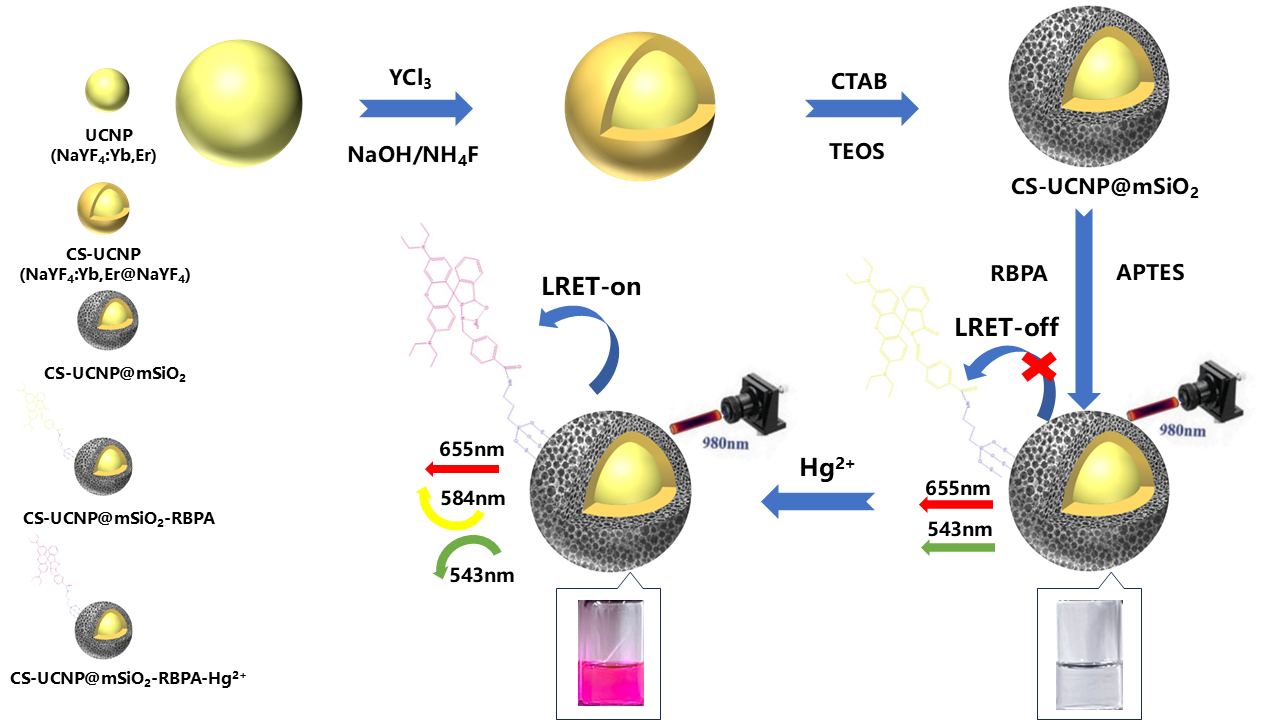

Supplement: Supplementary file 1 [file b1d98091947913741f5ea430.docx]
